# Supplementary material for: Optical gaps and excitons in semiconducting transition metal carbides (MXenes)
Source: Royal Society of Chemistry journal article supplement (doi:10.1039/d2tc00246a), 2022-01-01
Supplement: d2tc00246a1.pdf [file d2tc00246a1.pdf]

## Optical gaps and excitons in semiconducting transition metal carbides (MXenes)

### Electronic Supplementary Information

Tomi Ketolainen and František Karlický<sup>‡</sup>

*Department of Physics, Faculty of Science, University of Ostrava, 30. dubna 22, 701 03 Ostrava, Czech Republic*

The absorbance spectra computed with the PBE functional, HSE06 hybrid functional, and TD-HSE06 method for  $\text{Sc}_2\text{CF}_2$  and  $\text{Ti}_2\text{CO}_2$  are presented in Figs. S1 and S2, respectively.

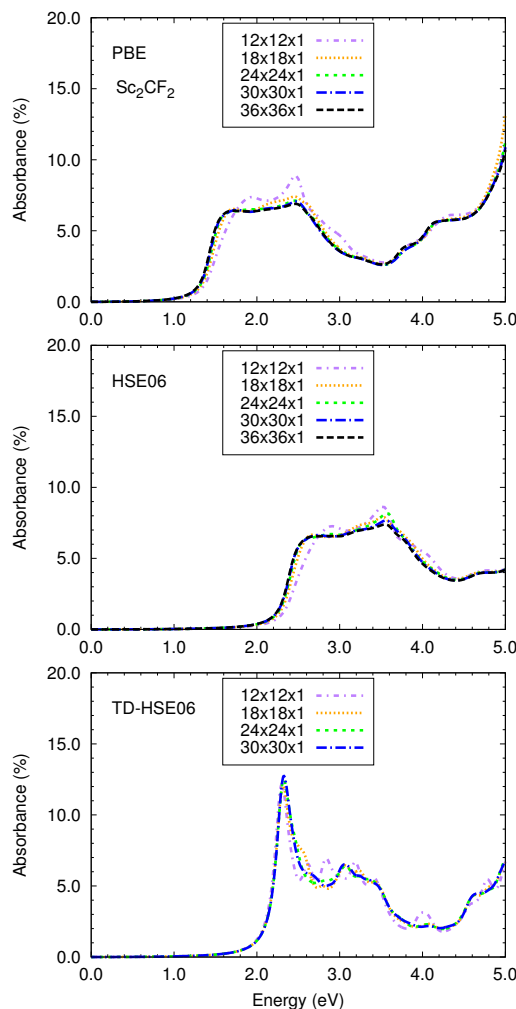

Figure S1. Optical absorbance spectra determined using different methods and k-point grids for  $\text{Sc}_2\text{CF}_2$ .

Calculating the absorbance spectra with several k-point grids shows that the PBE and HSE06 curves converge rapidly between 0.0 and 5.0 eV. In contrast, some oscillations can be seen in the TD-HSE06 spectrum curves particularly in the case of  $\text{Ti}_2\text{CO}_2$  but the first excitation energies are quite well converged with the  $24 \times 24 \times 1$  k-point grid, which can be observed in Fig. S2.

<sup>‡</sup> frantisek.karlicky@osu.cz

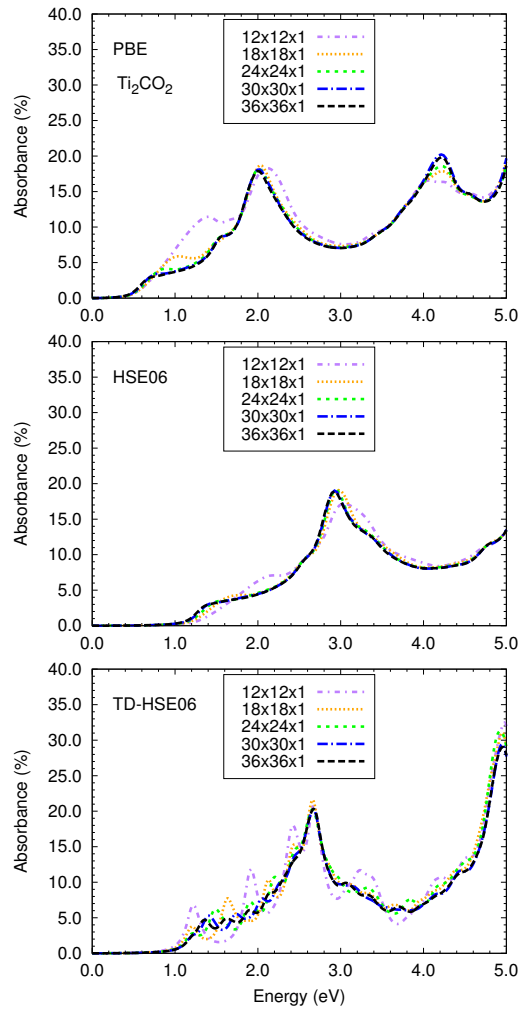

Figure S2. Optical absorbance spectra determined using different methods and k-point grids for  $\text{Ti}_2\text{CO}_2$ .

TABLE S1. The numbers of occupied (Occ.) and virtual (Virt.) bands, included in the Casida calculations (TD-HSE06). Reliability of optical absorbance spectra is ensured for photon energies up to 5 eV (see also Figure S4).

| $\text{M}_2\text{CT}_2$ MXene      | Occ. | Virt. |
|------------------------------------|------|-------|
| $\text{Sc}_2\text{CF}_2$           | 3    | 9     |
| $\text{Sc}_2\text{C}(\text{OH})_2$ | 7    | 8     |
| $\text{Ti}_2\text{C}$              | 5    | 11    |
| $\text{Ti}_2\text{CO}_2$           | 8    | 11    |
| $\text{Cr}_2\text{CF}_2$           | 5    | 5     |
| $\text{Cr}_2\text{C}(\text{OH})_2$ | 8    | 10    |
| $\text{Mn}_2\text{CO}_2$ (AFM)     | 4    | 7     |
| $\text{Mn}_2\text{CO}_2$ (FM)      | 10   | 8     |

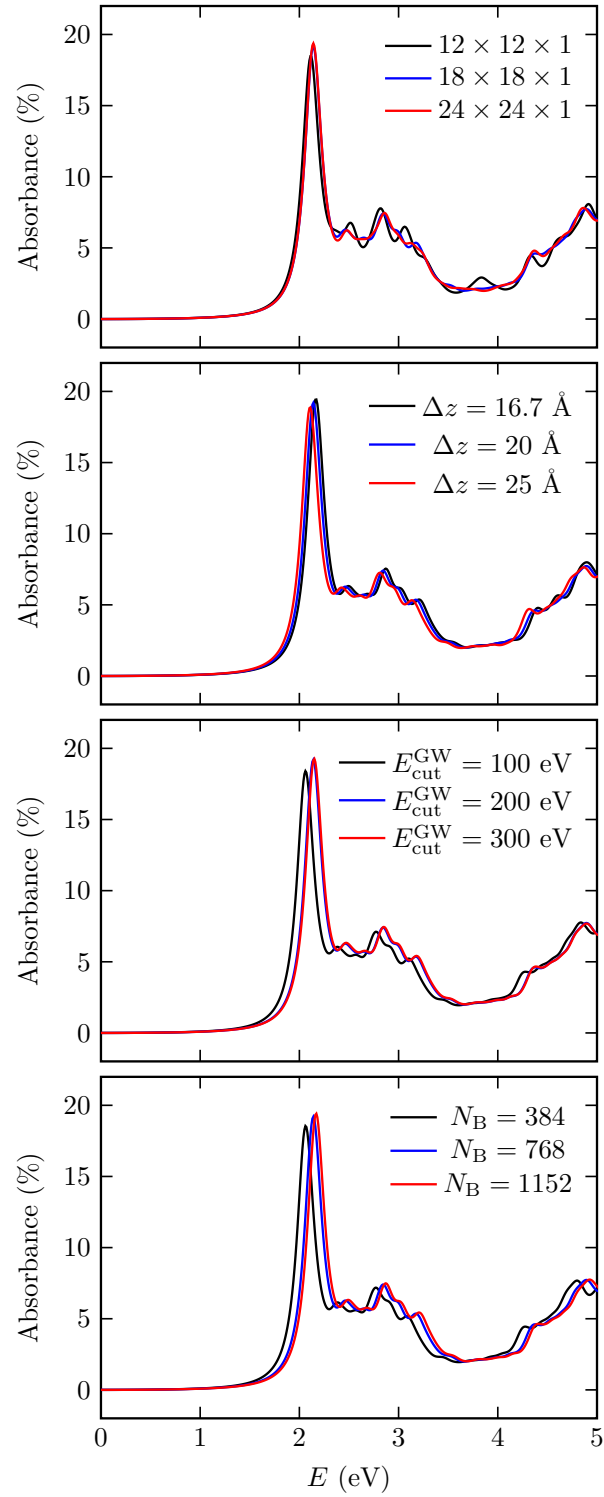

Figure S3. Convergence properties of optical absorbance  $A$  ( $A_{xx}$  component) for  $\text{Sc}_2\text{CF}_2$  computed with  $G_0W_0$ +BSE method: (top) dependence on the k-point grid, (middle top) dependence on the vacuum space  $\Delta z$ , (middle bottom) dependence on the GW energy cut-off  $E_{\text{cut}}^{\text{GW}}$ , and (bottom) dependence on the number of considered bands  $N_{\text{B}}$  in an input DFT calculation. Our standard  $G_0W_0$ +BSE calculation parameters are: the number of bands is  $N_{\text{B}} = 768$  (24 of them updated in GW and, finally 3 occupied and 9 virtual states in BSE), plane-wave energy cut-off  $E_{\text{cut}} = 500$  eV, GW cut-off  $E_{\text{cut}}^{\text{GW}} = 200$  eV,  $\Delta z = 20$  Å, and  $18 \times 18 \times 1$  k-point grid. Each subplot is the change in just one mentioned parameter. This setup leads to a direct quasiparticle gap of  $E_{\text{gap}}^{\text{GW}} = 2.82$  eV and optical gap of  $E_{\text{exc}}^{\text{BSE}} = 2.14$  eV.

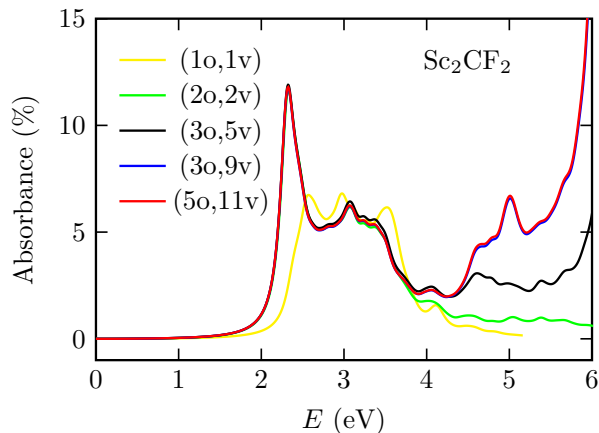

Figure S4. Dependence of optical absorbance for  $\text{Sc}_2\text{CF}_2$  computed with the TD-HSE06 method on the number of considered bands in the final (TD) step (o=occupied, v=virtual). Our final choice was always given by a criterion to have reliable optical absorbance spectra for photon energies up to 5 eV (here 3o and 9v was sufficient, see Table S1 for other materials).

TABLE S2. HSE06 band energies (eV) at the  $\Gamma$ -point of  $\text{Cr}_2\text{CF}_2$  (AFM) around the Fermi energy and the occupation numbers. The results are presented for both spin states (up and down). Here we report 5 occupied and 5 unoccupied bands as relevant (and used for a subsequent TD-HSE06 calculation) for Figure 6c of the main text. The band values are almost identical (maximal difference of 0.000001 eV), and the similar is valid for all k-points included in calculations.

| Band no. | Energy (up) | Energy (down) | Occ. (up) | Occ. (down) |
|----------|-------------|---------------|-----------|-------------|
| 11       | -2.667982   | -2.667981     | 1.000000  | 1.000000    |
| 12       | -2.667982   | -2.667981     | 1.000000  | 1.000000    |
| 13       | -1.586865   | -1.586865     | 1.000000  | 1.000000    |
| 14       | -1.586865   | -1.586865     | 1.000000  | 1.000000    |
| 15       | -0.563370   | -0.563370     | 1.000000  | 1.000000    |
| 16       | 1.301336    | 1.301336      | 0.000000  | 0.000000    |
| 17       | 1.462630    | 1.462629      | 0.000000  | 0.000000    |
| 18       | 2.388492    | 2.388492      | 0.000000  | 0.000000    |
| 19       | 2.865924    | 2.865924      | 0.000000  | 0.000000    |
| 20       | 2.865924    | 2.865924      | 0.000000  | 0.000000    |

TABLE S3. HSE06 band energies (eV) at the  $\Gamma$ -point of  $\text{Mn}_2\text{CO}_2$  (AFM) around the Fermi energy and the occupation numbers. The results are presented for both spin states (up and down). Here we report 4 occupied and 7 unoccupied bands as relevant (and used for subsequent TD-HSE06 calculation) for Figure 6d of the main text. The band values are almost identical (maximal difference of 0.000001 eV), and the similar is valid for all k-points included in calculations.

| Band no. | Energy (up) | Energy (down) | Occ. (up) | Occ. (down) |
|----------|-------------|---------------|-----------|-------------|
| 12       | -6.016402   | -6.016403     | 1.000000  | 1.000000    |
| 13       | -4.653811   | -4.653811     | 1.000000  | 1.000000    |
| 14       | -4.454214   | -4.454215     | 1.000000  | 1.000000    |
| 15       | -4.454214   | -4.454214     | 1.000000  | 1.000000    |
| 16       | -1.945553   | -1.945553     | 0.000000  | 0.000000    |
| 17       | -1.945553   | -1.945553     | 0.000000  | 0.000000    |
| 18       | -1.420894   | -1.420894     | 0.000000  | 0.000000    |
| 19       | -1.420894   | -1.420894     | 0.000000  | 0.000000    |
| 20       | -0.299977   | -0.299977     | 0.000000  | 0.000000    |
| 21       | 2.421854    | 2.421854      | 0.000000  | 0.000000    |
| 22       | 2.421854    | 2.421855      | 0.000000  | 0.000000    |

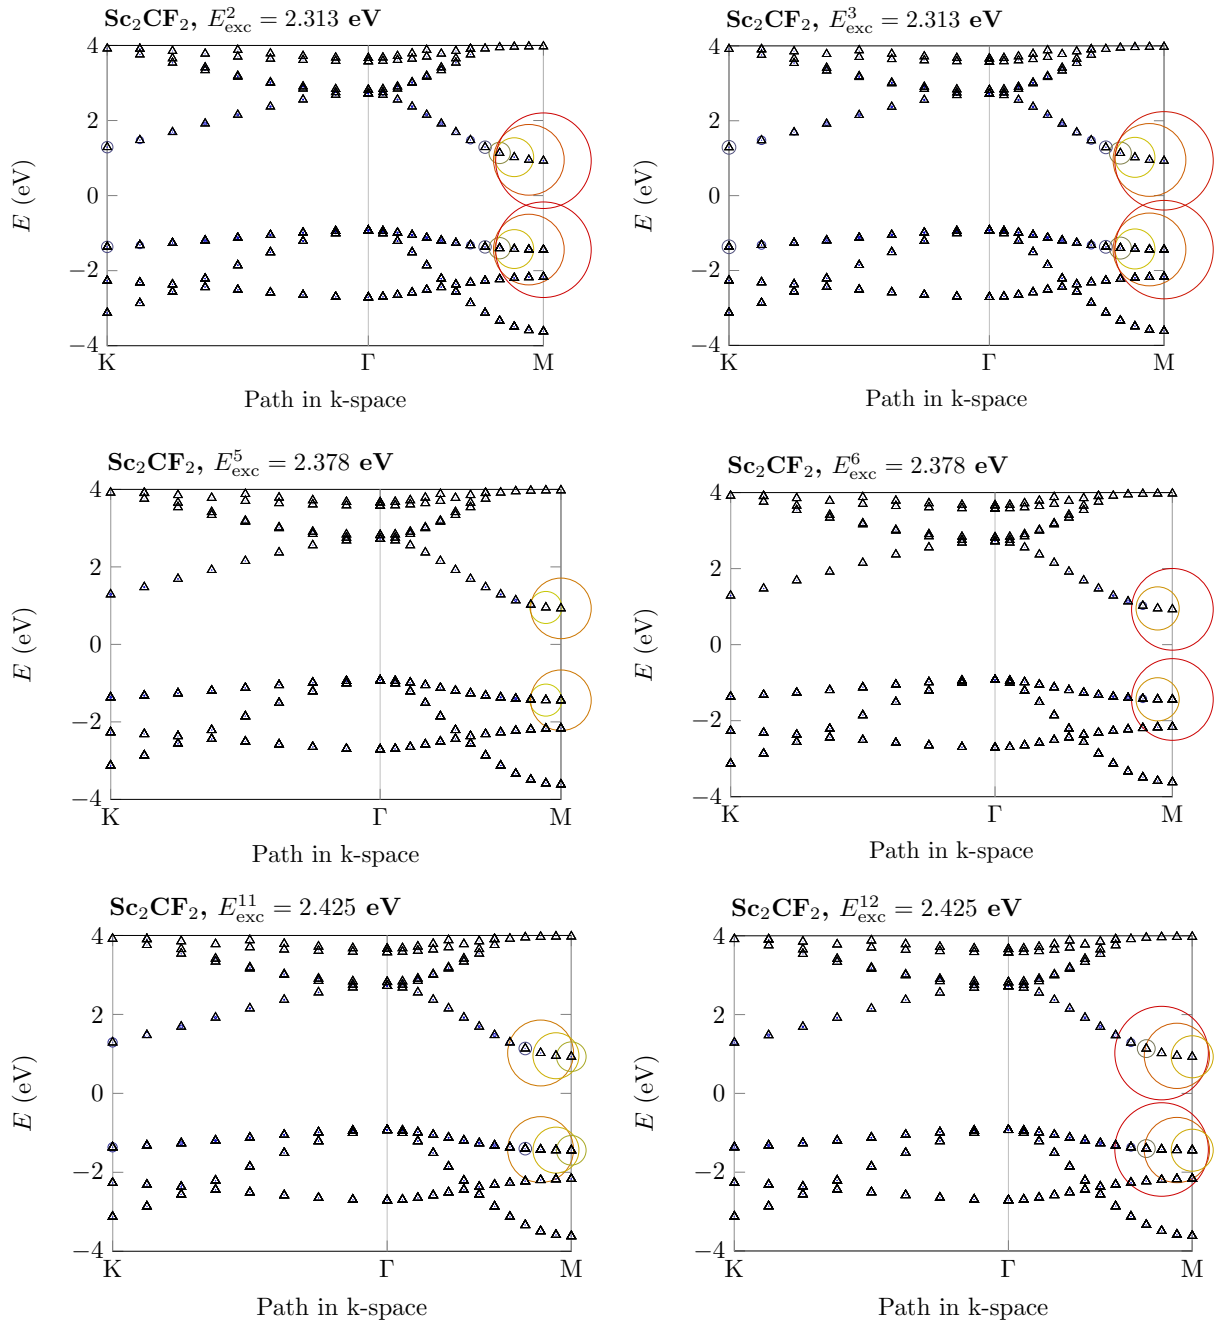

Figure S5. Comparison of important regions in the Brillouin zone of  $\text{Sc}_2\text{CF}_2$  using the  $A_{vck}^S$  coefficients (see also Eq. (3) in the main text) for selected excitations  $S = 2, 3$  (top), 5, 6, 11, and 12 (bottom). The  $|A_{vck}^S|$  coefficients (represented by the radii of coloured circles; red = maximum, yellow = middle, grey = minimum) are depicted together with the HSE06 band structure (black triangles). The Fermi energy is set to zero.

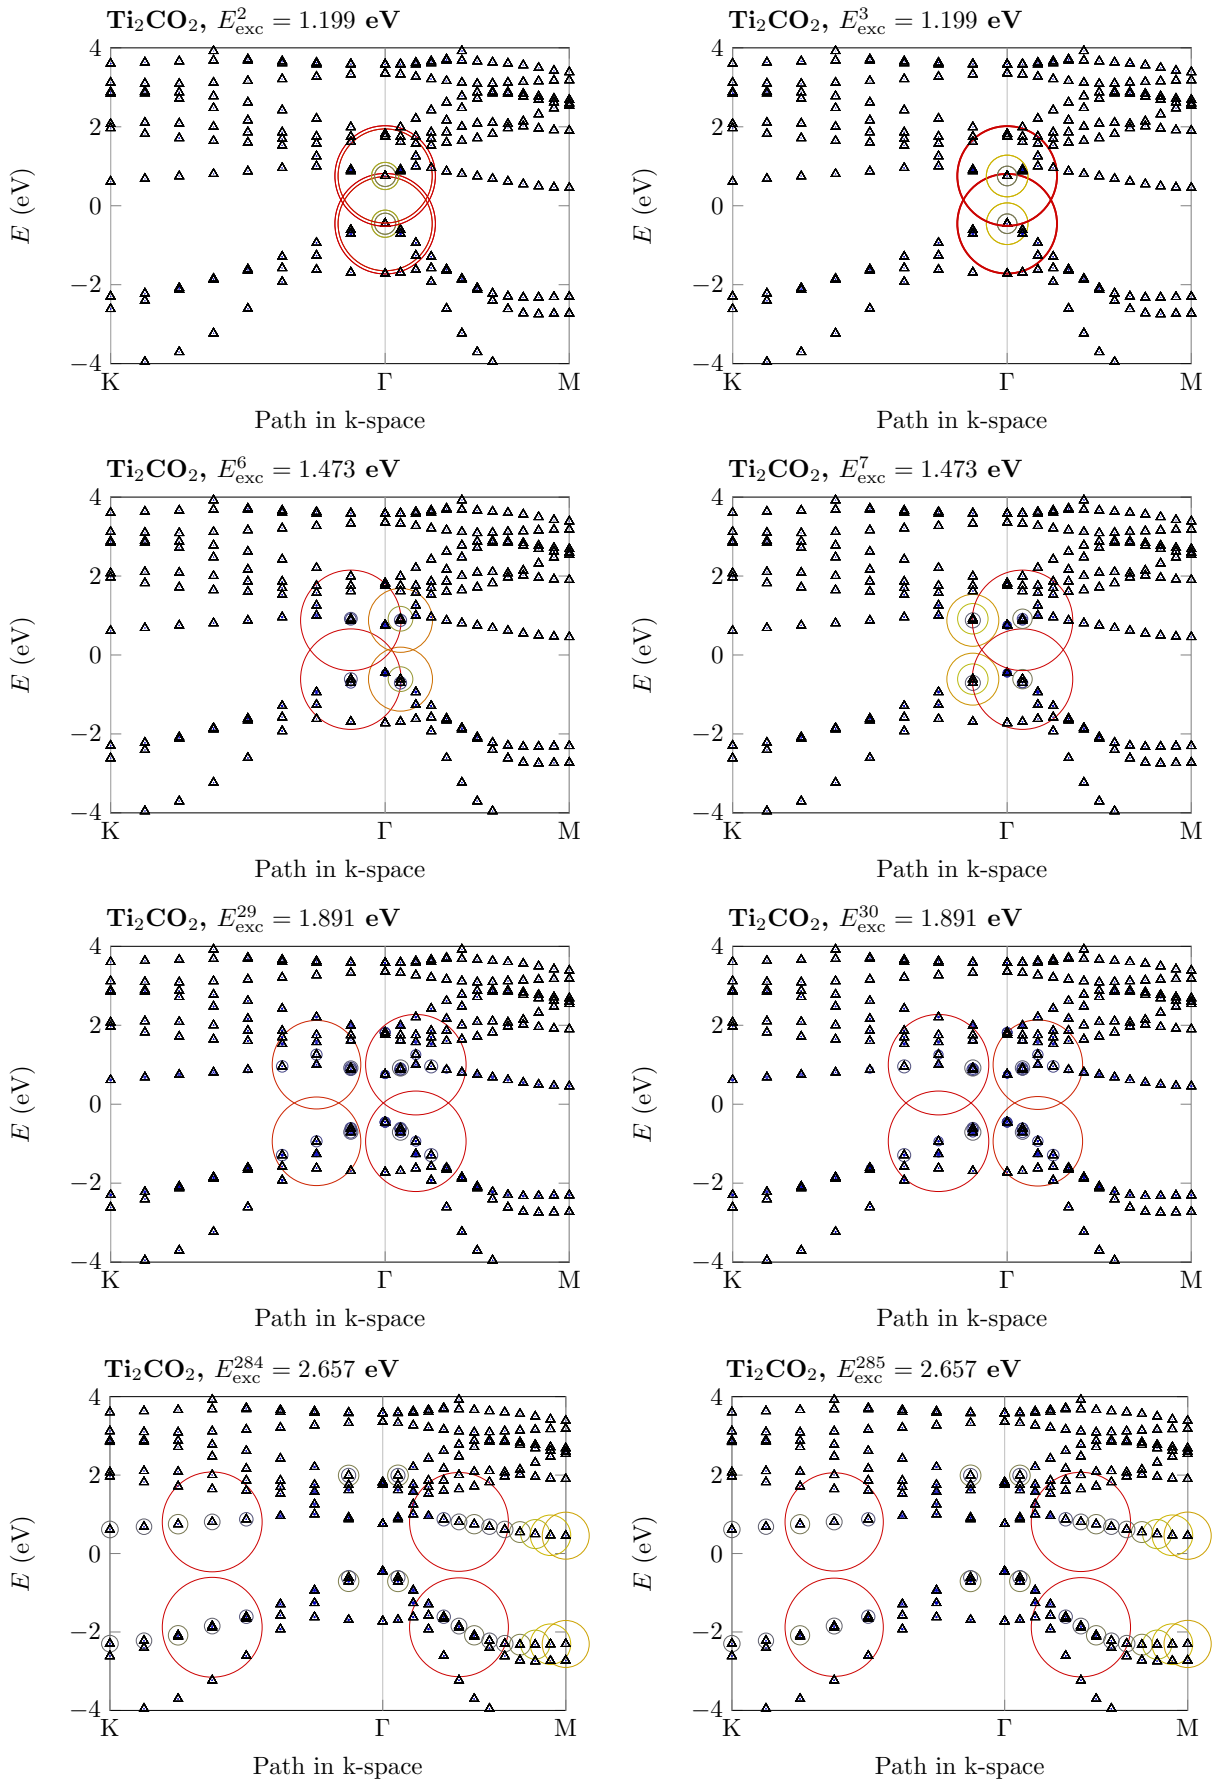

Figure S6. Comparison of important regions in the Brillouin zone of  $\text{Ti}_2\text{CO}_2$  using the  $A_{vck}^S$  coefficients (see also Eq. (3) in the main text) for selected excitations  $S = 2, 3$  (top),  $6, 7, 29, 30, 284$ , and  $285$  (bottom). The  $|A_{vck}^S|$  coefficients (represented by the radii of coloured circles; red = maximum, yellow = middle, grey = minimum) are depicted together with the HSE06 band structure (black triangles). The Fermi energy is set to zero.

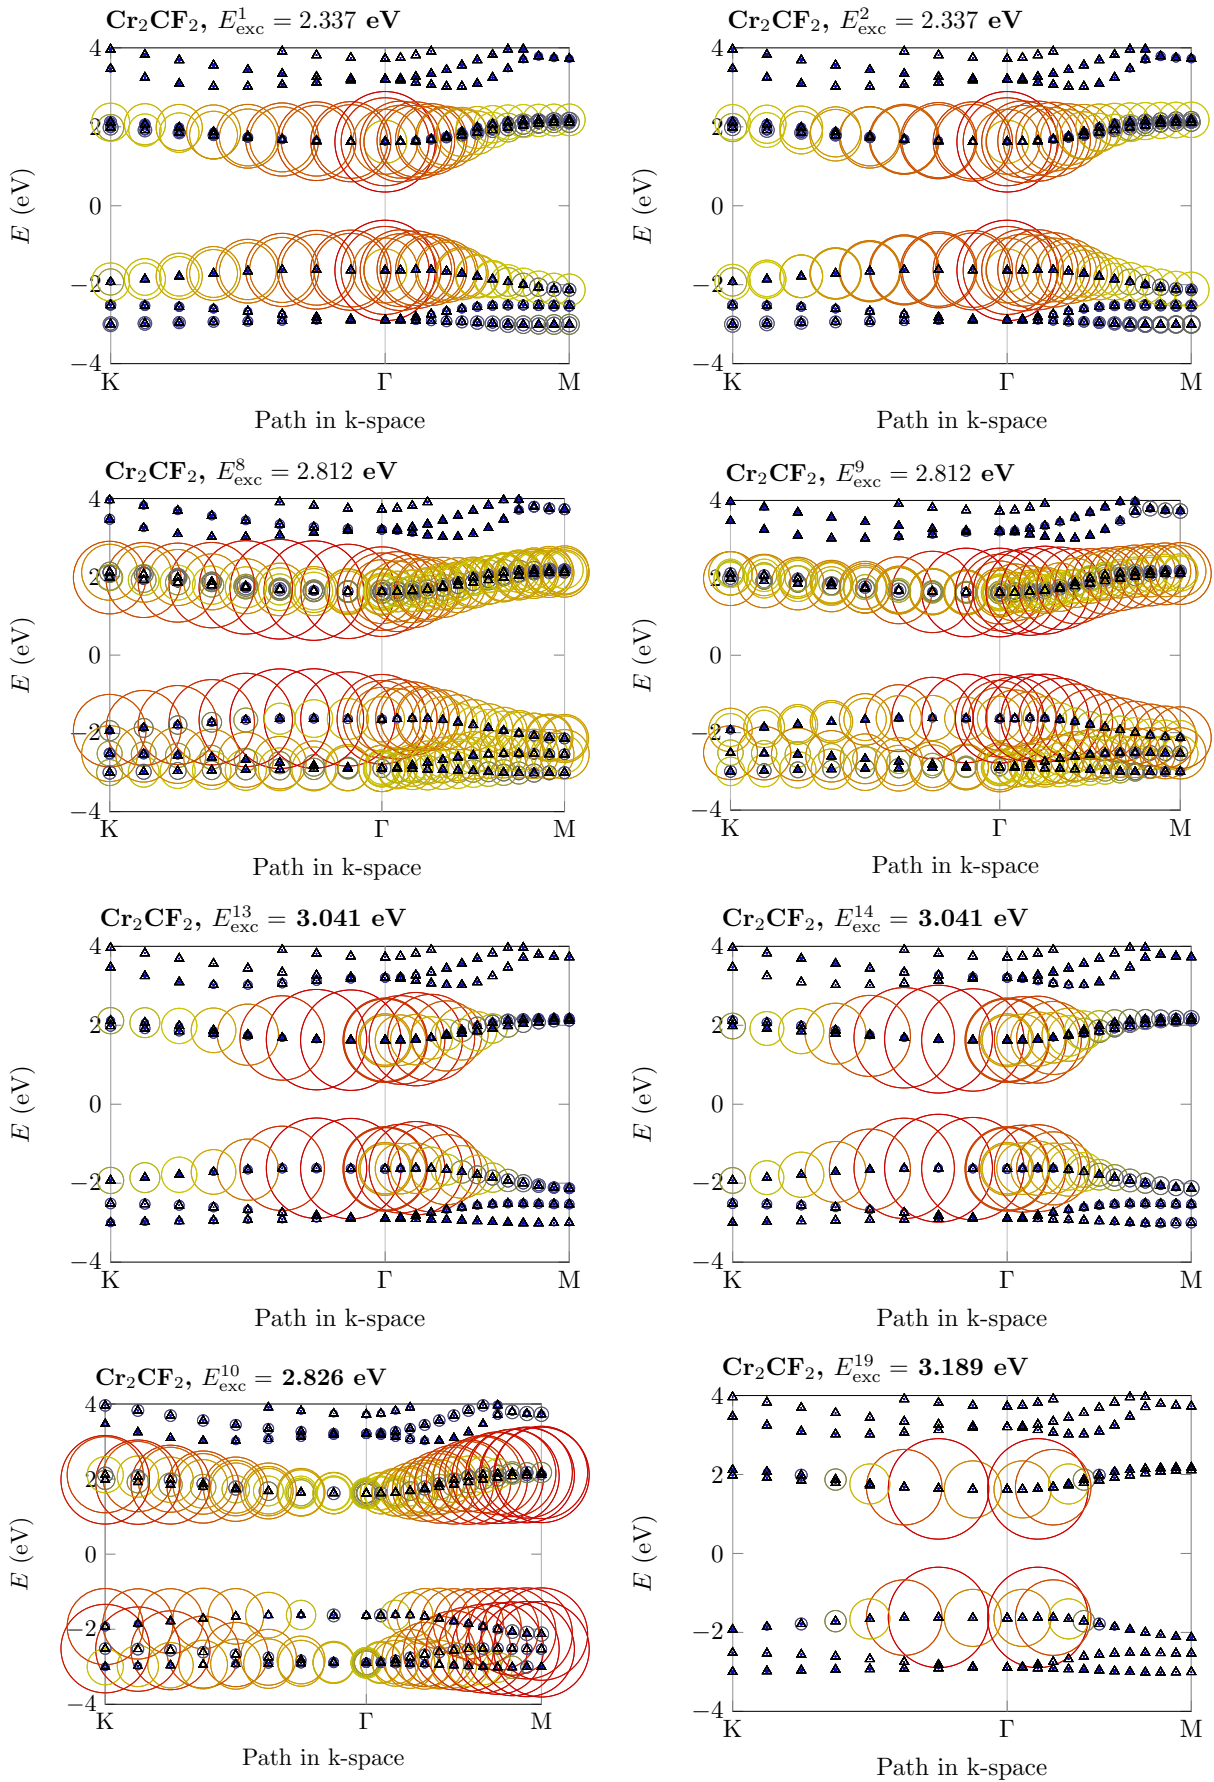

Figure S7. Comparison of important regions in the Brillouin zone of  $\text{Cr}_2\text{CF}_2$  using the  $A_{vck}^S$  coefficients (see also Eq. (3) in the main text) for selected excitations  $S = 1, 2$  (top), 8, 9, 13, 14, 10, and 19 (bottom). The  $|A_{vck}^S|$  coefficients (represented by the radii of coloured circles; red = maximum, yellow = middle, grey = minimum) are depicted together with the HSE06 band structure (black triangles). The Fermi energy is set to zero.

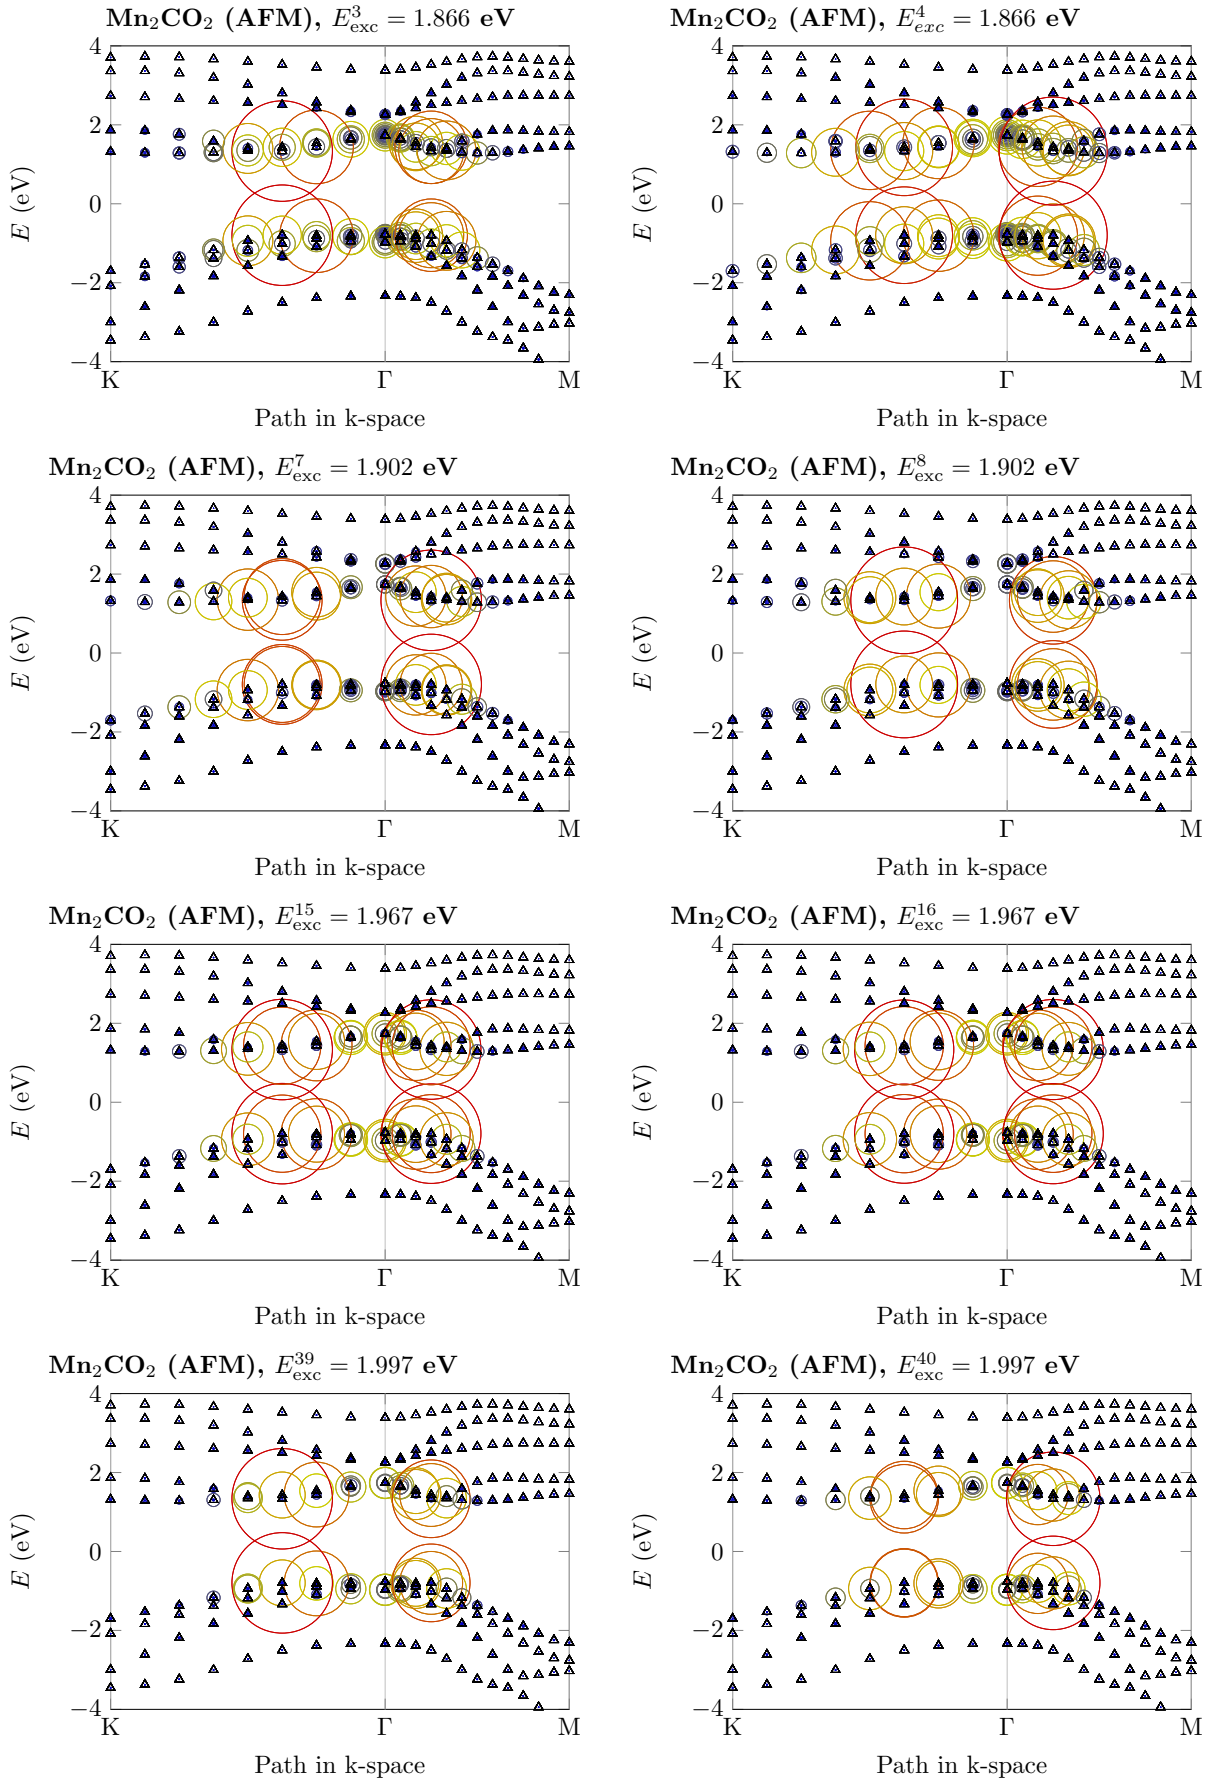

Figure S8. Comparison of important regions in the Brillouin zone of  $\text{Mn}_2\text{CO}_2$  (AFM) using the  $A_{vck}^S$  coefficients (see also Eq. (3) in the main text) for selected excitations  $S = 3, 4$  (top),  $7, 8, 15, 16, 39$ , and  $40$  (bottom). The  $|A_{vck}^S|$  coefficients (represented by the radii of coloured circles; red = maximum, yellow = middle, grey = minimum) are depicted together with the HSE06 band structure (black triangles). The Fermi energy is set to zero.



TABLE S4. Atomic charges (in  $e$ ) in considered materials provided by Bader charge analysis and using the PBE functional. Values are rounded-off to the two decimal places.

| $M_2CT_2$ MXene  | M    | C     | T          |
|------------------|------|-------|------------|
| $Sc_2CF_2$       | 1.62 | -1.79 | -0.73      |
| $Sc_2C(OH)_2$    | 1.60 | -1.80 | -1.25 0.54 |
| $Ti_2C$          | 0.96 | -1.92 |            |
| $Ti_2CO_2$       | 1.73 | -1.49 | -0.98      |
| $Cr_2CF_2$       | 1.36 | -1.36 | -0.68      |
| $Cr_2C(OH)_2$    | 1.32 | -1.35 | -1.21 0.66 |
| $Mn_2CO_2$ (AFM) | 1.43 | -1.16 | -0.86      |
| $Mn_2CO_2$ (FM)  | 1.47 | -1.19 | -0.87      |
